# Supplementary material
Source: publisher figshare collection journal article supplement (https://adisjournals.figshare.com/articles/dataset/_/14141468)
Supplement: Supplementary file 1 [file 2]

# Patient and Provider Insights into the Impact of Multiple Sclerosis on Mental Health: A Narrative Review

Bryan E Davis, Lynsey Lakin, Cherie C Binns, Keisha M Currie, Mary R Rensel

The authors of this work include **people living with MS** and **healthcare providers**, seeking to together raise the profile of **mental health concerns faced by people living with MS**

## What are some common mental health changes people living with MS may encounter?

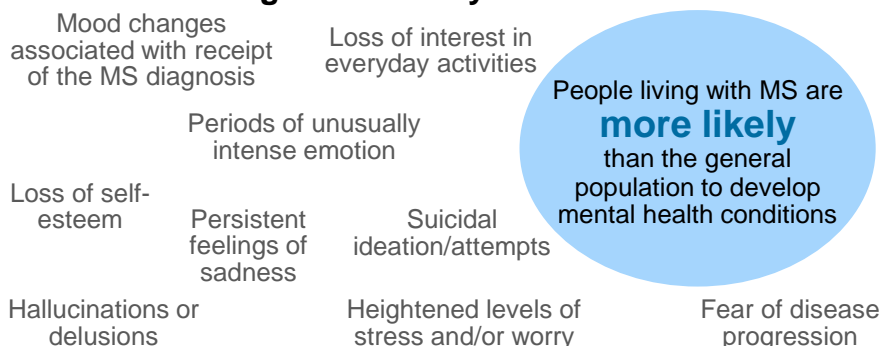

## What should you do if you experience these symptoms?

**Don't suffer in silence—** share any mental health changes with your MS care provider

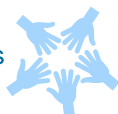

**Use providers that actively listen** and help make decisions about care together

## What can you do to manage your mental health?

Integrate care from medical professionals with a robust support system and **the right options for you.**

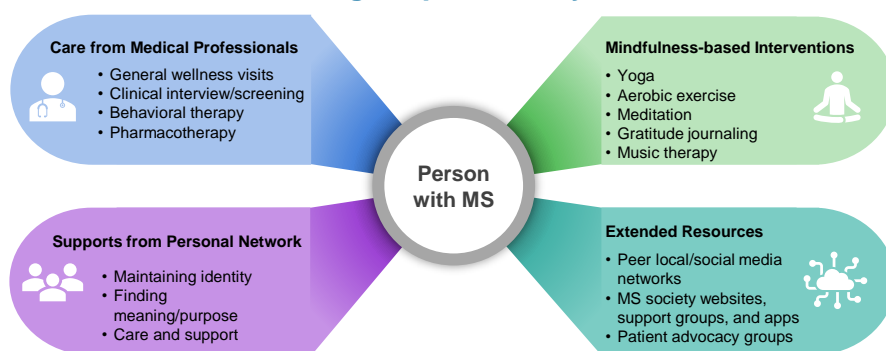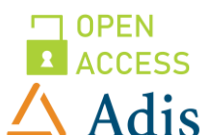

PEER-REVIEWED  
INFOGRAPHIC

This is a summary of a peer-reviewed article published in *Neurology and Therapy*, 2021.  
DOI: 10.1007/s40120-021-00240-9

This plain language summary represents the opinions of the authors. For a full list of declarations, including funding and author disclosure statements, please see the full text online. © The authors, CC-BY-NC 2021. Prepared by Meredith Whitaker, PhD, Alphabet Health. Plain language services were funded by Novartis. The original authors of the manuscript reviewed this summary.
